# Supplementary material for: Spectral Entropy Monitoring Accelerates the Emergence from Sevoflurane Anesthesia in Thoracic Surgery: A Randomized Controlled Trial
Source: MDPI journal article supplement (doi:10.3390/jcm11061631), 2022-03-15
Supplement: s1 [file s1]

Supplementary Table S1. Intraoperative hemodynamic parameters

|                                         | Entropy guidance |                              | Clinical signs |                              | <i>p</i> |
|-----------------------------------------|------------------|------------------------------|----------------|------------------------------|----------|
|                                         | <i>n</i> = 39    |                              | <i>n</i> = 37  |                              |          |
| <b>Before induction</b>                 |                  |                              |                |                              |          |
| Heart rate, beat·min <sup>-1</sup>      | 77               | 66 – 89<br>(41 – 112)        | 73             | 68 – 91<br>(56 – 116)        | 0.9917   |
| Systolic blood pressure, mm Hg          | 139              | 116 – 166<br>(106 – 199)     | 152            | 132 – 171<br>(107 – 207)     | 0.1372   |
| Diastolic blood pressure, mm Hg         | 86               | 80 – 92<br>(67 – 117)        | 84             | 76 – 95<br>(60 – 115)        | 0.3796   |
| Body temperature, °C                    | 36.1             | 35.9 – 36.5<br>(35.0 – 38.0) | 36.1           | 35.8 – 36.2<br>(35.1 – 37.1) | 0.2357   |
| SpO <sub>2</sub> , %                    | 98               | 96 – 99<br>(95 – 100)        | 97             | 96 – 98<br>(94 – 100)        | 0.0839   |
| <b>5 min after induction</b>            |                  |                              |                |                              |          |
| Heart rate, beat·min <sup>-1</sup>      | 82               | 71 – 93<br>(54 – 122)        | 88             | 80 – 98<br>(59 – 140)        | 0.0982   |
| Systolic blood pressure, mm Hg          | 110              | 98 – 129<br>(67 – 198)       | 108            | 98 – 129<br>(70 – 233)       | 0.9172   |
| Diastolic blood pressure, mm Hg         | 65               | 58 – 71<br>(40 – 103)        | 67             | 58 – 73<br>(46 – 138)        | 0.4924   |
| Body temperature, °C                    | 35.8             | 35.4 – 36.1<br>(34.7 – 36.7) | 35.8           | 35.5 – 36.1<br>(34.5 – 37.1) | 0.9792   |
| SpO <sub>2</sub> , %                    | 99               | 99 – 100<br>(96 – 100)       | 99             | 99 – 100<br>(95 – 100)       | 0.2369   |
| <b>5 min after one-lung ventilation</b> |                  |                              |                |                              |          |
| Heart rate, beat·min <sup>-1</sup>      | 77               | 67 – 87<br>(54 – 105)        | 84             | 71 – 90<br>(52 – 118)        | 0.1667   |
| Systolic blood pressure, mm Hg          | 115              | 105 – 137<br>(90 – 192)      | 115            | 102 – 132<br>(88 – 178)      | 0.9503   |
| Diastolic blood pressure, mm Hg         | 67               | 63 – 74<br>(48 – 107)        | 68             | 60 – 73<br>(45 – 95)         | 0.8637   |
| Body temperature, °C                    | 35.7             | 35.3 – 36.1<br>(33.9 – 36.7) | 35.8           | 35.5 – 36.0<br>(34.9 – 37.1) | 0.8635   |
| SpO <sub>2</sub> , %                    | 100              | 98 – 100<br>(94 – 100)       | 99             | 99 – 100<br>(78 – 100)       | 0.9147   |
| <b>5 min after chest is open</b>        |                  |                              |                |                              |          |
| Heart rate, beat·min <sup>-1</sup>      | 82               | 71 – 86<br>(61 – 101)        | 83             | 75 – 91<br>(61 – 107)        | 0.4571   |
| Systolic blood pressure, mm Hg          | 144              | 126 – 159<br>(99 – 178)      | 130            | 114 – 154<br>(93 – 204)      | 0.0984   |
| Diastolic blood pressure, mm Hg         | 83               | 72 – 95                      | 77             | 66 – 89                      | 0.1330   |

|                                          |      |                              |      |                              |        |
|------------------------------------------|------|------------------------------|------|------------------------------|--------|
|                                          |      | (57 – 119)                   |      | (49 – 110)                   |        |
| Body temperature, °C                     | 35.6 | 35.1 – 36.0<br>(33.8 – 36.6) | 35.7 | 35.3 – 35.9<br>(34.8 – 37.0) | 0.4226 |
| SpO <sub>2</sub> , %                     | 98   | 95 – 100<br>(72 – 100)       | 99   | 97 – 100<br>(91 – 100)       | 0.1863 |
| <b>Cessation of volatile anesthetics</b> |      |                              |      |                              |        |
| Heart rate, beat·min <sup>-1</sup>       | 87   | 72 – 93<br>(60 – 112)        | 86   | 75 – 96<br>(59 – 115)        | 0.6141 |
| Systolic blood pressure, mm Hg           | 137  | 123 – 154<br>(100 – 186)     | 131  | 119 – 145<br>(85 – 228)      | 0.2010 |
| Diastolic blood pressure, mm Hg          | 74   | 67 – 83<br>(56 – 107)        | 73   | 64 – 80<br>(48 – 125)        | 0.4635 |
| Body temperature, °C                     | 35.7 | 35.1 – 36.2<br>(33.9 – 37.0) | 35.8 | 35.4 – 36.4<br>(34.7 – 37.2) | 0.1915 |
| SpO <sub>2</sub> , %                     | 100  | 99 – 100<br>(72 – 100)       | 100  | 99 – 100<br>(93 – 100)       | 0.7329 |
| <b>5 min after tracheal extubation</b>   |      |                              |      |                              |        |
| Heart rate, beat·min <sup>-1</sup>       | 89   | 78 – 98<br>(57 – 123)        | 85   | 79 – 100<br>(59 – 114)       | 0.8191 |
| Systolic blood pressure, mm Hg           | 135  | 125 – 161<br>(92 – 186)      | 137  | 118 – 153<br>(97 – 179)      | 0.4604 |
| Diastolic blood pressure, mm Hg          | 75   | 70 – 85<br>(58 – 99)         | 75   | 66 – 84<br>(50 – 104)        | 0.5191 |
| Body temperature, °C                     | 36.2 | 35.9 – 36.3<br>(35.0 – 37.4) | 36.3 | 36.0 – 36.5<br>(34.7 – 37.7) | 0.1939 |
| SpO <sub>2</sub> , %                     | 100  | 98 – 100<br>(95 – 100)       | 100  | 98 – 100<br>(96 – 100)       | 0.8660 |

Values are median with interquartile range (range). Abbreviations: SpO<sub>2</sub>, peripheral oxygen saturation by pulse oximetry.
